# Supplementary material for: Deficient Chaperone-Mediated Autophagy Promotes Inflammation and Atherosclerosis
Source: PubMed Central journal article supplement — Circ Res. 2021 Oct 27;129(12):1141–57. doi: 10.1161/CIRCRESAHA.121.318908 (PMC8638823; doi:10.1161/circresaha.121.318908), 2021-10-27
Supplement: res-129-1141-s002.pdf [file res-129-1141-s002.pdf]

## Major Resources Table

In order to allow validation and replication of experiments, all essential research materials listed in the Methods should be included in the Major Resources Table below. Authors are encouraged to use public repositories for protocols, data, code, and other materials and provide persistent identifiers and/or links to repositories when available. Authors may add or delete rows as needed.

### Animals (in vivo studies)

| Species                  | Vendor or Source                            | Background Strain | Sex  | Persistent ID / URL                                                   |
|--------------------------|---------------------------------------------|-------------------|------|-----------------------------------------------------------------------|
| ApoE <sup>-/-</sup> mice | Vital River Laboratory<br>Animal Technology | C57BL/6           | Male | <a href="https://www.vitalriver.com/">https://www.vitalriver.com/</a> |
| C57BL/6N mice            | Vital River Laboratory<br>Animal Technology | C57BL/6           | Male | <a href="https://www.vitalriver.com/">https://www.vitalriver.com/</a> |

### Genetically Modified Animals

|                 | Species                | Vendor or Source  | Background Strain | Other Information              | Persistent ID / URL |
|-----------------|------------------------|-------------------|-------------------|--------------------------------|---------------------|
| Parent - Male   | LAMP-2A-deficient mice | Viewsolid Biotech | C57BL/6           | generated by Viewsolid Biotech |                     |
| Parent - Female |                        |                   |                   |                                |                     |

### Antibodies

| Target antigen | Vendor or Source | Catalog #   | Working concentration | Lot # (preferred but not required) | Persistent ID / URL                                                                                                                                                                                                                                                                                                                                                                                                             |
|----------------|------------------|-------------|-----------------------|------------------------------------|---------------------------------------------------------------------------------------------------------------------------------------------------------------------------------------------------------------------------------------------------------------------------------------------------------------------------------------------------------------------------------------------------------------------------------|
| MOMA-2         | AbD              | MCA519G     | 1:200                 |                                    | <a href="https://www.bio-rad-antibodies.com/results/go?w=MOMA2">https://www.bio-rad-antibodies.com/results/go?w=MOMA2</a>                                                                                                                                                                                                                                                                                                       |
| LAMP-2A        | Invitrogen       | AMC2        | 1:200 or 1:1000       |                                    | <a href="https://www.thermofisher.cn/cn/zh/antibody/product/LAMP-2A-Antibody-clone-AMC2-Polyclonal/51-2200">https://www.thermofisher.cn/cn/zh/antibody/product/LAMP-2A-Antibody-clone-AMC2-Polyclonal/51-2200</a>                                                                                                                                                                                                               |
| LAMP-2A        | Abcam            | ab18528     | 1:200                 |                                    | <a href="https://www.abcam.cn/lamp2a-antibody-lysosome-marker-ab18528.html">https://www.abcam.cn/lamp2a-antibody-lysosome-marker-ab18528.html</a>                                                                                                                                                                                                                                                                               |
| LAMP-2A        | Abcam            | Ab125068    | 1:200 or 1:1000       |                                    | <a href="https://www.abcam.cn/lamp2a-antibody-epr42072-lysosome-marker-ab125068.html">https://www.abcam.cn/lamp2a-antibody-epr42072-lysosome-marker-ab125068.html</a>                                                                                                                                                                                                                                                           |
| $\alpha$ -SMA  | CST              | #19245      | 1:200                 |                                    | <a href="https://www.cellsignal.cn/products/primary-antibodies/a-smooth-muscle-actin-d4k9n-xp-rabbit-mab/19245?site-search-type=Products&amp;N=4294956287&amp;Ntt=%2319245&amp;fromPage=plp&amp;_requestid=939425">https://www.cellsignal.cn/products/primary-antibodies/a-smooth-muscle-actin-d4k9n-xp-rabbit-mab/19245?site-search-type=Products&amp;N=4294956287&amp;Ntt=%2319245&amp;fromPage=plp&amp;_requestid=939425</a> |
| CD68           | OmnimABs         | OM245833    | 1:200                 |                                    | <a href="http://www.omnimabs.com/antibody_CD68_antibody_-OM245833.html">http://www.omnimabs.com/antibody_CD68_antibody_-OM245833.html</a>                                                                                                                                                                                                                                                                                       |
| F4/80          | Abcam            | ab16911     | 1:200                 |                                    | <a href="https://www.abcam.cn/f480-antibody-bm8-ab16911.html">https://www.abcam.cn/f480-antibody-bm8-ab16911.html</a>                                                                                                                                                                                                                                                                                                           |
| LAMP1          | Abcam            | ab25245     | 1:200                 |                                    | <a href="https://www.abcam.cn/lamp1-antibody-1d4b-ab25245.html">https://www.abcam.cn/lamp1-antibody-1d4b-ab25245.html</a>                                                                                                                                                                                                                                                                                                       |
| NLRP3          | AdipoGen         | AG-20B-0014 | 1:200                 |                                    | <a href="https://adipogen.com/catalogsearch/result/?q=AG-20B-0014">https://adipogen.com/catalogsearch/result/?q=AG-20B-0014</a>                                                                                                                                                                                                                                                                                                 |
| LAMP2          | Abcam            | ab13524     | 1:1000                |                                    | <a href="https://www.abcam.cn/lamp2-antibody-gl2a7-ab13524.html">https://www.abcam.cn/lamp2-antibody-gl2a7-ab13524.html</a>                                                                                                                                                                                                                                                                                                     |
| LAMP1          | CST              | #9091       | 1:1000                |                                    | <a href="https://www.cellsignal.cn/products/primary-antibodies/lamp1-d2d11-xp-rabbit-">https://www.cellsignal.cn/products/primary-antibodies/lamp1-d2d11-xp-rabbit-</a>                                                                                                                                                                                                                                                         |

DOI [to be added]

|                           |          |             |                    |  |                                                                                                                                                                                                               |
|---------------------------|----------|-------------|--------------------|--|---------------------------------------------------------------------------------------------------------------------------------------------------------------------------------------------------------------|
|                           |          |             |                    |  | mab/9091?site-search-type=Products&N=4294956287&Ntt=%239091&fromPage=plp&_requestid=941955                                                                                                                    |
| NLRP3                     | AdipoGen | AG-20B-0014 | 1:200              |  | https://adipogen.com/ag-20b-0014-anti-nlrp3-nalp3-mab-cryo-2.html                                                                                                                                             |
| NLRP3                     | Abcam    | ab263899    | 1:1000<br>or 1:100 |  | https://www.abcam.cn/nlrp3-antibody-epr23094-1-ab263899.html                                                                                                                                                  |
| pro-Caspase-1 + p10 + p12 | Abcam    | ab179515    | 1:1000             |  | https://www.abcam.cn/pro-caspase-1--p10--p12-antibody-epr16883-ab179515.html                                                                                                                                  |
| ASC                       | CST      | #67824      | 1:1000             |  | https://www.cellsignal.cn/products/primary-antibodies/asc-tms1-d2w8u-rabbit-mab-mouse-specific/67824?site-search-type=Products&N=4294956287&Ntt=%2367824&fromPage=plp&_requestid=942433                       |
| IL-1 $\beta$ (p31)        | Abcam    | ab234437    | 1:1000             |  | https://www.abcam.cn/il-1-beta-antibody-epr16805-15-ab234437.html                                                                                                                                             |
| IL-1 $\beta$ (p17)        | CST      | #63124      | 1:1000             |  | https://www.cellsignal.cn/products/primary-antibodies/cleaved-il-1b-asp117-e7v2a-rabbit-mab-mouse-specific/63124?site-search-type=Products&N=4294956287&Ntt=%2363124&fromPage=plp&_requestid=942785           |
| JNK                       | CST      | #9252       | 1:1000             |  | https://www.cellsignal.cn/products/primary-antibodies/sapk-jnk-antibody/9252?site-search-type=Products&N=4294956287&Ntt=%239252&fromPage=plp&_requestid=942983                                                |
| p-JNK                     | CST      | #9251       | 1:1000             |  | https://www.cellsignal.cn/products/primary-antibodies/phospho-sapk-jnk-thr183-tyr185-antibody/9251?site-search-type=Products&N=4294956287&Ntt=%239251&fromPage=plp&_requestid=943082                          |
| p38 MAPK                  | CST      | #8690       | 1:1000             |  | https://www.cellsignal.cn/products/primary-antibodies/p38-mapk-d13e1-xp-rabbit-mab/8690?site-search-type=Products&N=4294956287&Ntt=%238690&fromPage=plp&_requestid=943149                                     |
| p-p38 MAPK                | CST      | #4511       | 1:1000             |  | https://www.cellsignal.cn/products/primary-antibodies/phospho-p38-mapk-thr180-tyr182-d3f9-xp-rabbit-mab/4511?site-search-type=Products&N=4294956287&Ntt=%234511&fromPage=plp&_requestid=943220                |
| p44/42 MAPK (Erk1/2)      | CST      | #4695       | 1:1000             |  | https://www.cellsignal.cn/products/primary-antibodies/p44-42-mapk-erk1-2-137f5-rabbit-mab/4695?site-search-type=Products&N=4294956287&Ntt=%234695&fromPage=plp                                                |
| p-p44/42 MAPK (Erk1/2)    | CST      | #4370       | 1:1000             |  | https://www.cellsignal.cn/products/primary-antibodies/phospho-p44-42-mapk-erk1-2-thr202-tyr204-d13-14-4e-xp-rabbit-mab/4370?site-search-type=Products&N=4294956287&Ntt=%234370&fromPage=plp&_requestid=943472 |

|                                 |                   |        |        |                                                                                                                                                                                                                                                                                                                                                                                                                           |
|---------------------------------|-------------------|--------|--------|---------------------------------------------------------------------------------------------------------------------------------------------------------------------------------------------------------------------------------------------------------------------------------------------------------------------------------------------------------------------------------------------------------------------------|
| NF- $\kappa$ B p65              | CST               | #8242  | 1:1000 | <a href="https://www.cellsignal.cn/products/primary-antibodies/nf-kb-p65-d14e12-xp-rabbit-mab/8242?site-search-type=Products&amp;N=4294956287&amp;Ntt=%238242&amp;fromPage=plp&amp;_requestid=943565">https://www.cellsignal.cn/products/primary-antibodies/nf-kb-p65-d14e12-xp-rabbit-mab/8242?site-search-type=Products&amp;N=4294956287&amp;Ntt=%238242&amp;fromPage=plp&amp;_requestid=943565</a>                     |
| p-NF- $\kappa$ B p65 (Ser536)   | CST               | #3033  | 1:1000 | <a href="https://www.cellsignal.cn/products/primary-antibodies/phospho-nf-kb-p65-ser536-93h1-rabbit-mab/3033?site-search-type=Products&amp;N=4294956287&amp;Ntt=%233033&amp;fromPage=plp&amp;_requestid=943667">https://www.cellsignal.cn/products/primary-antibodies/phospho-nf-kb-p65-ser536-93h1-rabbit-mab/3033?site-search-type=Products&amp;N=4294956287&amp;Ntt=%233033&amp;fromPage=plp&amp;_requestid=943667</a> |
| I $\kappa$ B $\alpha$           | CST               | #4812  | 1:1000 | <a href="https://www.cellsignal.cn/products/primary-antibodies/ikba-44d4-rabbit-mab/4812?site-search-type=Products&amp;N=4294956287&amp;Ntt=%234812&amp;fromPage=plp&amp;_requestid=943752">https://www.cellsignal.cn/products/primary-antibodies/ikba-44d4-rabbit-mab/4812?site-search-type=Products&amp;N=4294956287&amp;Ntt=%234812&amp;fromPage=plp&amp;_requestid=943752</a>                                         |
| p-I $\kappa$ B $\alpha$ (Ser32) | CST               | #2859  | 1:1000 | <a href="https://www.cellsignal.cn/products/primary-antibodies/phospho-ikba-ser32-14d4-rabbit-mab/2859?site-search-type=Products&amp;N=4294956287&amp;Ntt=%232859&amp;fromPage=plp&amp;_requestid=943885">https://www.cellsignal.cn/products/primary-antibodies/phospho-ikba-ser32-14d4-rabbit-mab/2859?site-search-type=Products&amp;N=4294956287&amp;Ntt=%232859&amp;fromPage=plp&amp;_requestid=943885</a>             |
| Histone H3                      | CST               | #4499  | 1:1000 | <a href="https://www.cellsignal.cn/products/primary-antibodies/histone-h3-d1h2-xp-rabbit-mab/4499?site-search-type=Products&amp;N=4294956287&amp;Ntt=%234499&amp;fromPage=plp&amp;_requestid=943941">https://www.cellsignal.cn/products/primary-antibodies/histone-h3-d1h2-xp-rabbit-mab/4499?site-search-type=Products&amp;N=4294956287&amp;Ntt=%234499&amp;fromPage=plp&amp;_requestid=943941</a>                       |
| Perilipin 2                     | Progen Biotechnik | GP40   | 1:1000 | <a href="https://www.progen.com/anti-Perilipin-2-N-terminus-aa-1-29-guinea-pig-polyclonal-serum/GP40">https://www.progen.com/anti-Perilipin-2-N-terminus-aa-1-29-guinea-pig-polyclonal-serum/GP40</a>                                                                                                                                                                                                                     |
| SQSTM1/p62                      | CST               | #39749 | 1:1000 | <a href="https://www.cellsignal.cn/products/primary-antibodies/sqstm1-p62-d1q5s-rabbit-mab/39749?site-search-type=Products&amp;N=4294956287&amp;Ntt=%2339749&amp;fromPage=plp&amp;_requestid=945054">https://www.cellsignal.cn/products/primary-antibodies/sqstm1-p62-d1q5s-rabbit-mab/39749?site-search-type=Products&amp;N=4294956287&amp;Ntt=%2339749&amp;fromPage=plp&amp;_requestid=945054</a>                       |
| LC3B                            | CST               | #43566 | 1:1000 | <a href="https://www.cellsignal.cn/products/primary-antibodies/lc3b-e7x4s-xp-rabbit-mab/43566?site-search-type=Products&amp;N=4294956287&amp;Ntt=%2343566&amp;fromPage=plp&amp;_requestid=945221">https://www.cellsignal.cn/products/primary-antibodies/lc3b-e7x4s-xp-rabbit-mab/43566?site-search-type=Products&amp;N=4294956287&amp;Ntt=%2343566&amp;fromPage=plp&amp;_requestid=945221</a>                             |
| Atg7                            | CST               | #8558  | 1:1000 | <a href="https://www.cellsignal.cn/products/primary-antibodies/atg7-d12b11-rabbit-mab/8558?site-search-type=Products&amp;N=4294956287&amp;Ntt=%238558&amp;fromPage=plp&amp;_requestid=946231">https://www.cellsignal.cn/products/primary-antibodies/atg7-d12b11-rabbit-mab/8558?site-search-type=Products&amp;N=4294956287&amp;Ntt=%238558&amp;fromPage=plp&amp;_requestid=946231</a>                                     |
| Atg5                            | CST               | #12994 | 1:1000 | <a href="https://www.cellsignal.cn/products/primary-antibodies/atg5-d5f5u-rabbit-mab/12994?site-search-type=Products&amp;N=4294956287&amp;Ntt=%2312994&amp;fromPage=plp&amp;_requestid=946348">https://www.cellsignal.cn/products/primary-antibodies/atg5-d5f5u-rabbit-mab/12994?site-search-type=Products&amp;N=4294956287&amp;Ntt=%2312994&amp;fromPage=plp&amp;_requestid=946348</a>                                   |
| Beclin-1                        | CST               | #3495  | 1:1000 | <a href="https://www.cellsignal.cn/products/primary-antibodies/beclin-1-d40c5-rabbit-mab/3495?site-search-">https://www.cellsignal.cn/products/primary-antibodies/beclin-1-d40c5-rabbit-mab/3495?site-search-</a>                                                                                                                                                                                                         |

|                                               |          |          |        |  |                                                                                                                                                                                                                                                                                                                                                                                                                                                 |
|-----------------------------------------------|----------|----------|--------|--|-------------------------------------------------------------------------------------------------------------------------------------------------------------------------------------------------------------------------------------------------------------------------------------------------------------------------------------------------------------------------------------------------------------------------------------------------|
|                                               |          |          |        |  | type=Products&N=4294956287&Ntt=%233495&fromPage=plp&_requestid=946495                                                                                                                                                                                                                                                                                                                                                                           |
| Cathepsin B                                   | Abcam    | ab214428 | 1:1000 |  | <a href="https://www.abcam.cn/cathepsin-b-antibody-epr21033-ab214428.html">https://www.abcam.cn/cathepsin-b-antibody-epr21033-ab214428.html</a>                                                                                                                                                                                                                                                                                                 |
| Cathepsin D                                   | Abcam    | ab75852  | 1:1000 |  | <a href="https://www.abcam.cn/cathepsin-d-antibody-epr3057y-ab75852.html">https://www.abcam.cn/cathepsin-d-antibody-epr3057y-ab75852.html</a>                                                                                                                                                                                                                                                                                                   |
| $\beta$ -actin                                | CST      | #4970    | 1:1000 |  | <a href="https://www.cellsignal.cn/products/primary-antibodies/b-actin-13e5-rabbit-mab/4970?site-search-type=Products&amp;N=4294956287&amp;Ntt=%234970&amp;fromPage=plp&amp;_requestid=946742">https://www.cellsignal.cn/products/primary-antibodies/b-actin-13e5-rabbit-mab/4970?site-search-type=Products&amp;N=4294956287&amp;Ntt=%234970&amp;fromPage=plp&amp;_requestid=946742</a>                                                         |
| HSC70                                         | Abcam    | ab51052  | 1:200  |  | <a href="https://www.abcam.cn/hsc70-antibody-ep1531y-ab51052.html">https://www.abcam.cn/hsc70-antibody-ep1531y-ab51052.html</a>                                                                                                                                                                                                                                                                                                                 |
| Ubiquitin                                     | CST      | #3933    | 1:200  |  | <a href="https://www.cellsignal.cn/products/primary-antibodies/ubiquitin-antibody/3933?site-search-type=Products&amp;N=4294956287&amp;Ntt=3933s&amp;fromPage=plp&amp;_requestid=948947">https://www.cellsignal.cn/products/primary-antibodies/ubiquitin-antibody/3933?site-search-type=Products&amp;N=4294956287&amp;Ntt=3933s&amp;fromPage=plp&amp;_requestid=948947</a>                                                                       |
| K48-linkage Specific Polyubiquitin            | CST      | #8081    | 1:200  |  | <a href="https://www.cellsignal.cn/products/primary-antibodies/k48-linkage-specific-polyubiquitin-d9d5-rabbit-mab/8081?site-search-type=Products&amp;N=4294956287&amp;Ntt=%238081&amp;fromPage=plp&amp;_requestid=949098">https://www.cellsignal.cn/products/primary-antibodies/k48-linkage-specific-polyubiquitin-d9d5-rabbit-mab/8081?site-search-type=Products&amp;N=4294956287&amp;Ntt=%238081&amp;fromPage=plp&amp;_requestid=949098</a>   |
| K63-linkage Specific Polyubiquitin            | CST      | #5621    | 1:200  |  | <a href="https://www.cellsignal.cn/products/primary-antibodies/k63-linkage-specific-polyubiquitin-d7a11-rabbit-mab/5621?site-search-type=Products&amp;N=4294956287&amp;Ntt=%235621&amp;fromPage=plp&amp;_requestid=949188">https://www.cellsignal.cn/products/primary-antibodies/k63-linkage-specific-polyubiquitin-d7a11-rabbit-mab/5621?site-search-type=Products&amp;N=4294956287&amp;Ntt=%235621&amp;fromPage=plp&amp;_requestid=949188</a> |
| HRP-conjugated goat anti-rabbit IgG           | ZSJB-BIO | PV-9001  |        |  | <a href="http://www.zsbio.com/product/PV-9001">http://www.zsbio.com/product/PV-9001</a>                                                                                                                                                                                                                                                                                                                                                         |
| HRP-conjugated goat anti-mice IgG             | ZSJB-BIO | PV-9002  |        |  | <a href="http://www.zsbio.com/product/PV-9002">http://www.zsbio.com/product/PV-9002</a>                                                                                                                                                                                                                                                                                                                                                         |
| HRP-conjugated goat anti-rat IgG              | ZSJB-BIO | PV-9004  |        |  | <a href="http://www.zsbio.com/product/PV-9004">http://www.zsbio.com/product/PV-9004</a>                                                                                                                                                                                                                                                                                                                                                         |
| Donkey anti-mouse IgG H&L (Alexa Fluor® 594)  | Abcam    | ab150112 | 1:1000 |  | <a href="https://www.abcam.cn/donkey-mouse-igg-hl-alex-fluor-594-preadsorbed-ab150112.html">https://www.abcam.cn/donkey-mouse-igg-hl-alex-fluor-594-preadsorbed-ab150112.html</a>                                                                                                                                                                                                                                                               |
| Donkey anti-rat IgG H&L (Alexa Fluor® 594)    | Abcam    | ab150156 | 1:1000 |  | <a href="https://www.abcam.cn/donkey-rat-igg-hl-alex-fluor-594-preadsorbed-ab150156.html">https://www.abcam.cn/donkey-rat-igg-hl-alex-fluor-594-preadsorbed-ab150156.html</a>                                                                                                                                                                                                                                                                   |
| Donkey anti-rabbit IgG H&L (Alexa Fluor® 488) | Abcam    | ab150061 | 1:1000 |  | <a href="https://www.abcam.cn/donkey-rabbit-igg-hl-alex-fluor-488-preadsorbed-ab150061.html">https://www.abcam.cn/donkey-rabbit-igg-hl-alex-fluor-488-preadsorbed-ab150061.html</a>                                                                                                                                                                                                                                                             |

|                                     |          |         |        |  |                                                                                                                                                                                                                                                                                                                                                                         |
|-------------------------------------|----------|---------|--------|--|-------------------------------------------------------------------------------------------------------------------------------------------------------------------------------------------------------------------------------------------------------------------------------------------------------------------------------------------------------------------------|
| HRP-conjugated goat anti-rabbit IgG | ZSJB-BIO | ZB-2301 | 1:5000 |  | <a href="http://www.zsbio.com/product/ZB-2301">http://www.zsbio.com/product/ZB-2301</a>                                                                                                                                                                                                                                                                                 |
| HRP-conjugated goat anti-mice IgG   | ZSJB-BIO | ZB-2305 | 1:5000 |  | <a href="http://www.zsbio.com/product/ZB-2305">http://www.zsbio.com/product/ZB-2305</a>                                                                                                                                                                                                                                                                                 |
| HRP-conjugated goat anti-mice IgG   | ZSJB-BIO | ZB-2307 | 1:5000 |  | <a href="http://www.zsbio.com/product/ZB-2307">http://www.zsbio.com/product/ZB-2307</a>                                                                                                                                                                                                                                                                                 |
| Goat Anti-Guinea pig IgG            | Abcam    | ab6908  | 1:5000 |  | <a href="https://www.abcam.cn/goat-guinea-pig-igg-hl-hrp-ab6908.html">https://www.abcam.cn/goat-guinea-pig-igg-hl-hrp-ab6908.html</a>                                                                                                                                                                                                                                   |
| Normal rabbit IgG                   | CST      | #2729   |        |  | <a href="https://www.cellsignal.cn/products/primary-antibodies/normal-rabbit-igg/2729?site-search-type=Products&amp;N=4294956287&amp;Ntt=2729&amp;fromPage=plp&amp;_requestid=2746638">https://www.cellsignal.cn/products/primary-antibodies/normal-rabbit-igg/2729?site-search-type=Products&amp;N=4294956287&amp;Ntt=2729&amp;fromPage=plp&amp;_requestid=2746638</a> |

#### DNA/cDNA Clones

| Clone Name | Sequence | Source / Repository | Persistent ID / URL |
|------------|----------|---------------------|---------------------|
|            |          |                     |                     |
|            |          |                     |                     |
|            |          |                     |                     |

#### Cultured Cells

| Name                           | Vendor or Source                             | Sex (F, M, or unknown) | Persistent ID / URL                                                                         |
|--------------------------------|----------------------------------------------|------------------------|---------------------------------------------------------------------------------------------|
| HEK293T cells                  | ATCC                                         |                        | <a href="https://www.atcc.org/products/acs-4500">https://www.atcc.org/products/acs-4500</a> |
| Primary peritoneal macrophages | L2A-m $\emptyset$ KO mice or WT C57BL/6 mice | M                      |                                                                                             |
|                                |                                              |                        |                                                                                             |

#### Data & Code Availability

| Description | Source / Repository | Persistent ID / URL |
|-------------|---------------------|---------------------|
|             |                     |                     |
|             |                     |                     |
|             |                     |                     |

#### Other

| Description                  | Source / Repository | Persistent ID / URL                                                                                                                                                                                                                             |
|------------------------------|---------------------|-------------------------------------------------------------------------------------------------------------------------------------------------------------------------------------------------------------------------------------------------|
| AEC Peroxidase Substrate Kit | Solarbio            | <a href="http://www.solarbio.com/goods-1470.html">http://www.solarbio.com/goods-1470.html</a>                                                                                                                                                   |
| DAPI                         | Abcam               | <a href="https://www.abcam.cn/mounting-medium-with-dapi-aqueous-fluoroshield-ab104139.html">https://www.abcam.cn/mounting-medium-with-dapi-aqueous-fluoroshield-ab104139.html</a>                                                               |
| Protein extraction kit       | Invent              | <a href="https://www.inventchina.cn/pro_view.asp?id=85&amp;class=1">https://www.inventchina.cn/pro_view.asp?id=85&amp;class=1</a>                                                                                                               |
| Lipofectamine 2000           | Thermo Fisher       | <a href="https://www.thermofisher.cn/order/catalog/product/11668019?SID=srch-srp-11668019#/11668019?SID=srch-srp-11668019">https://www.thermofisher.cn/order/catalog/product/11668019?SID=srch-srp-11668019#/11668019?SID=srch-srp-11668019</a> |

DOI [to be added]

|                                                |               |                                                                                                                                                                                                                                                                                                                                                                   |
|------------------------------------------------|---------------|-------------------------------------------------------------------------------------------------------------------------------------------------------------------------------------------------------------------------------------------------------------------------------------------------------------------------------------------------------------------|
| Mouse IL-1 beta/IL-1F2 Quantikine HS ELISA Kit | R&D           | <a href="https://www.rndsystems.com/cn/products/mouse-il-1-beta-il-1f2-quantikine-elisa-kit_mlb00c">https://www.rndsystems.com/cn/products/mouse-il-1-beta-il-1f2-quantikine-elisa-kit_mlb00c</a>                                                                                                                                                                 |
| Mouse IL-1 beta/IL-1F2 Quantikine ELISA Kit    | R&D           | <a href="https://www.rndsystems.com/cn/products/mouse-il-1-beta-il-1f2-quantikine-hs-elisa-kit_mhslb00">https://www.rndsystems.com/cn/products/mouse-il-1-beta-il-1f2-quantikine-hs-elisa-kit_mhslb00</a>                                                                                                                                                         |
| Mouse IL-18/IL-1F4 ELISA                       | R&D           | <a href="https://www.rndsystems.com/cn/products/mouse-il-18-il-1f4-elisa_7625">https://www.rndsystems.com/cn/products/mouse-il-18-il-1f4-elisa_7625</a>                                                                                                                                                                                                           |
| Mouse TNF-alpha Quantikine HS ELISA Kit        | R&D           | <a href="https://www.rndsystems.com/cn/products/mouse-tnf-alpha-quantikine-hs-elisa-kit_mhsta50">https://www.rndsystems.com/cn/products/mouse-tnf-alpha-quantikine-hs-elisa-kit_mhsta50</a>                                                                                                                                                                       |
| Mouse TNF-alpha Quantikine ELISA Kit           | R&D           | <a href="https://www.rndsystems.com/cn/products/mouse-tnf-alpha-quantikine-elisa-kit_mta00b">https://www.rndsystems.com/cn/products/mouse-tnf-alpha-quantikine-elisa-kit_mta00b</a>                                                                                                                                                                               |
| LPS                                            | Sigma         | <a href="https://www.sigmaaldrich.cn/CN/zh/product/sigma/l2880?context=product">https://www.sigmaaldrich.cn/CN/zh/product/sigma/l2880?context=product</a>                                                                                                                                                                                                         |
| ATP                                            | Sigma         | <a href="https://www.sigmaaldrich.cn/CN/zh/product/sigma/a7699?context=product">https://www.sigmaaldrich.cn/CN/zh/product/sigma/a7699?context=product</a>                                                                                                                                                                                                         |
| Cycloheximide                                  | CST           | <a href="https://www.cellsignal.cn/products/activators-inhibitors/cycloheximide/2112?site-search-type=Products&amp;N=4294956287&amp;Ntt=chx&amp;fromPage=plp&amp;_requestid=959402">https://www.cellsignal.cn/products/activators-inhibitors/cycloheximide/2112?site-search-type=Products&amp;N=4294956287&amp;Ntt=chx&amp;fromPage=plp&amp;_requestid=959402</a> |
| RIPA lysis buffer                              | Solarbio      | <a href="http://www.solarbio.com/goods-1164.html">http://www.solarbio.com/goods-1164.html</a>                                                                                                                                                                                                                                                                     |
| Protease inhibitor cocktail                    | Solarbio      | <a href="http://www.solarbio.com/goods-25748.html">http://www.solarbio.com/goods-25748.html</a>                                                                                                                                                                                                                                                                   |
| Immobilon ECL ultra western HRP substrate      | Millipore     | <a href="https://www.sigmaaldrich.cn/CN/zh/product/mm/wbuls0500?context=product">https://www.sigmaaldrich.cn/CN/zh/product/mm/wbuls0500?context=product</a>                                                                                                                                                                                                       |
| Immunoprecipitation Kits                       | Abcam         | <a href="https://www.abcam.cn/immunoprecipitation-kit-ab206996.html">https://www.abcam.cn/immunoprecipitation-kit-ab206996.html</a>                                                                                                                                                                                                                               |
| 2x SDS-PAGE loading buffer                     | Beyotime      | <a href="https://www.beyotime.com/product/P0015B.htm">https://www.beyotime.com/product/P0015B.htm</a>                                                                                                                                                                                                                                                             |
| LysoSensor™ Yellow/Blue DND-160                | Thermo Fisher | <a href="https://www.thermofisher.cn/order/catalog/product/L7545?SID=srch-hj-L7545#/L7545?SID=srch-hj-L7545">https://www.thermofisher.cn/order/catalog/product/L7545?SID=srch-hj-L7545#/L7545?SID=srch-hj-L7545</a>                                                                                                                                               |
| Micro $\beta$ -galactosidase assay kit         | Solarbio      | <a href="http://www.solarbio.com/goods-9310.html">http://www.solarbio.com/goods-9310.html</a>                                                                                                                                                                                                                                                                     |
| Lysosome Isolation Kit                         | Sigma         | <a href="https://www.sigmaaldrich.cn/CN/zh/product/sigma/lysiso1?context=product">https://www.sigmaaldrich.cn/CN/zh/product/sigma/lysiso1?context=product</a>                                                                                                                                                                                                     |
| Bafilomycin A1                                 | APEX BIO      | <a href="https://www.apexbt.com/bafilomycin-a1.html">https://www.apexbt.com/bafilomycin-a1.html</a>                                                                                                                                                                                                                                                               |
| Hematoxylin-Eosin/HE Staining Kit              | Solarbio      | <a href="http://www.solarbio.com/goods-1225.html">http://www.solarbio.com/goods-1225.html</a>                                                                                                                                                                                                                                                                     |
